# Supplementary material for: Rapid Screening of Lipase Inhibitors from Ophiopogonis Radix Using High-Performance Thin Layer Chromatography by Two Step Gradient Elution Combined with Bioautographic Method
Source: MDPI journal article supplement (doi:10.3390/molecules27041155), 2022-02-09
Supplement: s1 [file s1]

# Rapid Screening of Lipase Inhibitors from *Ophiopogonis Radix* Using High-Performance Thin Layer Chromatography by Two Step Gradient Elution Combined with Bioautographic Method

Xue Hua <sup>1,†</sup>, Hui-Jie Hong <sup>1,†</sup>, Dai-Yan Zhang <sup>1</sup>, Qiao Liu <sup>1</sup>, Fong Leong <sup>1</sup>, Qi Yang <sup>1</sup>, Yuan-Jia Hu <sup>1,\*</sup> and Xiao-Jia Chen <sup>1,2,\*</sup>

<sup>1</sup> Institute of Chinese Medical Sciences, and State Key Laboratory of Quality Research in Chinese Medicine, University of Macau, Macao SAR, China; mb75819@connect.um.edu.mo (X.H.); yc17534@um.edu.mo (H.-J.H.); yc07528@um.edu.mo (D.-Y.Z.); yb87502@um.edu.mo (Q.L.); yb37501@um.edu.mo (F.L.); mc05849@um.edu.mo (Q.Y.)

<sup>2</sup> Zhuhai UM Science & Technology Research Institute, Zhuhai 519031, China

\* Correspondence: YuanjiaHu@um.edu.mo (Y.-J.H.); XiaojiaChen@um.edu.mo (X.-J.C.); Tel.: +853-88228507 (Y.-J.H.); +853-88224915 (X.-J.C.)

<sup>†</sup> These authors contributed equally to this work.

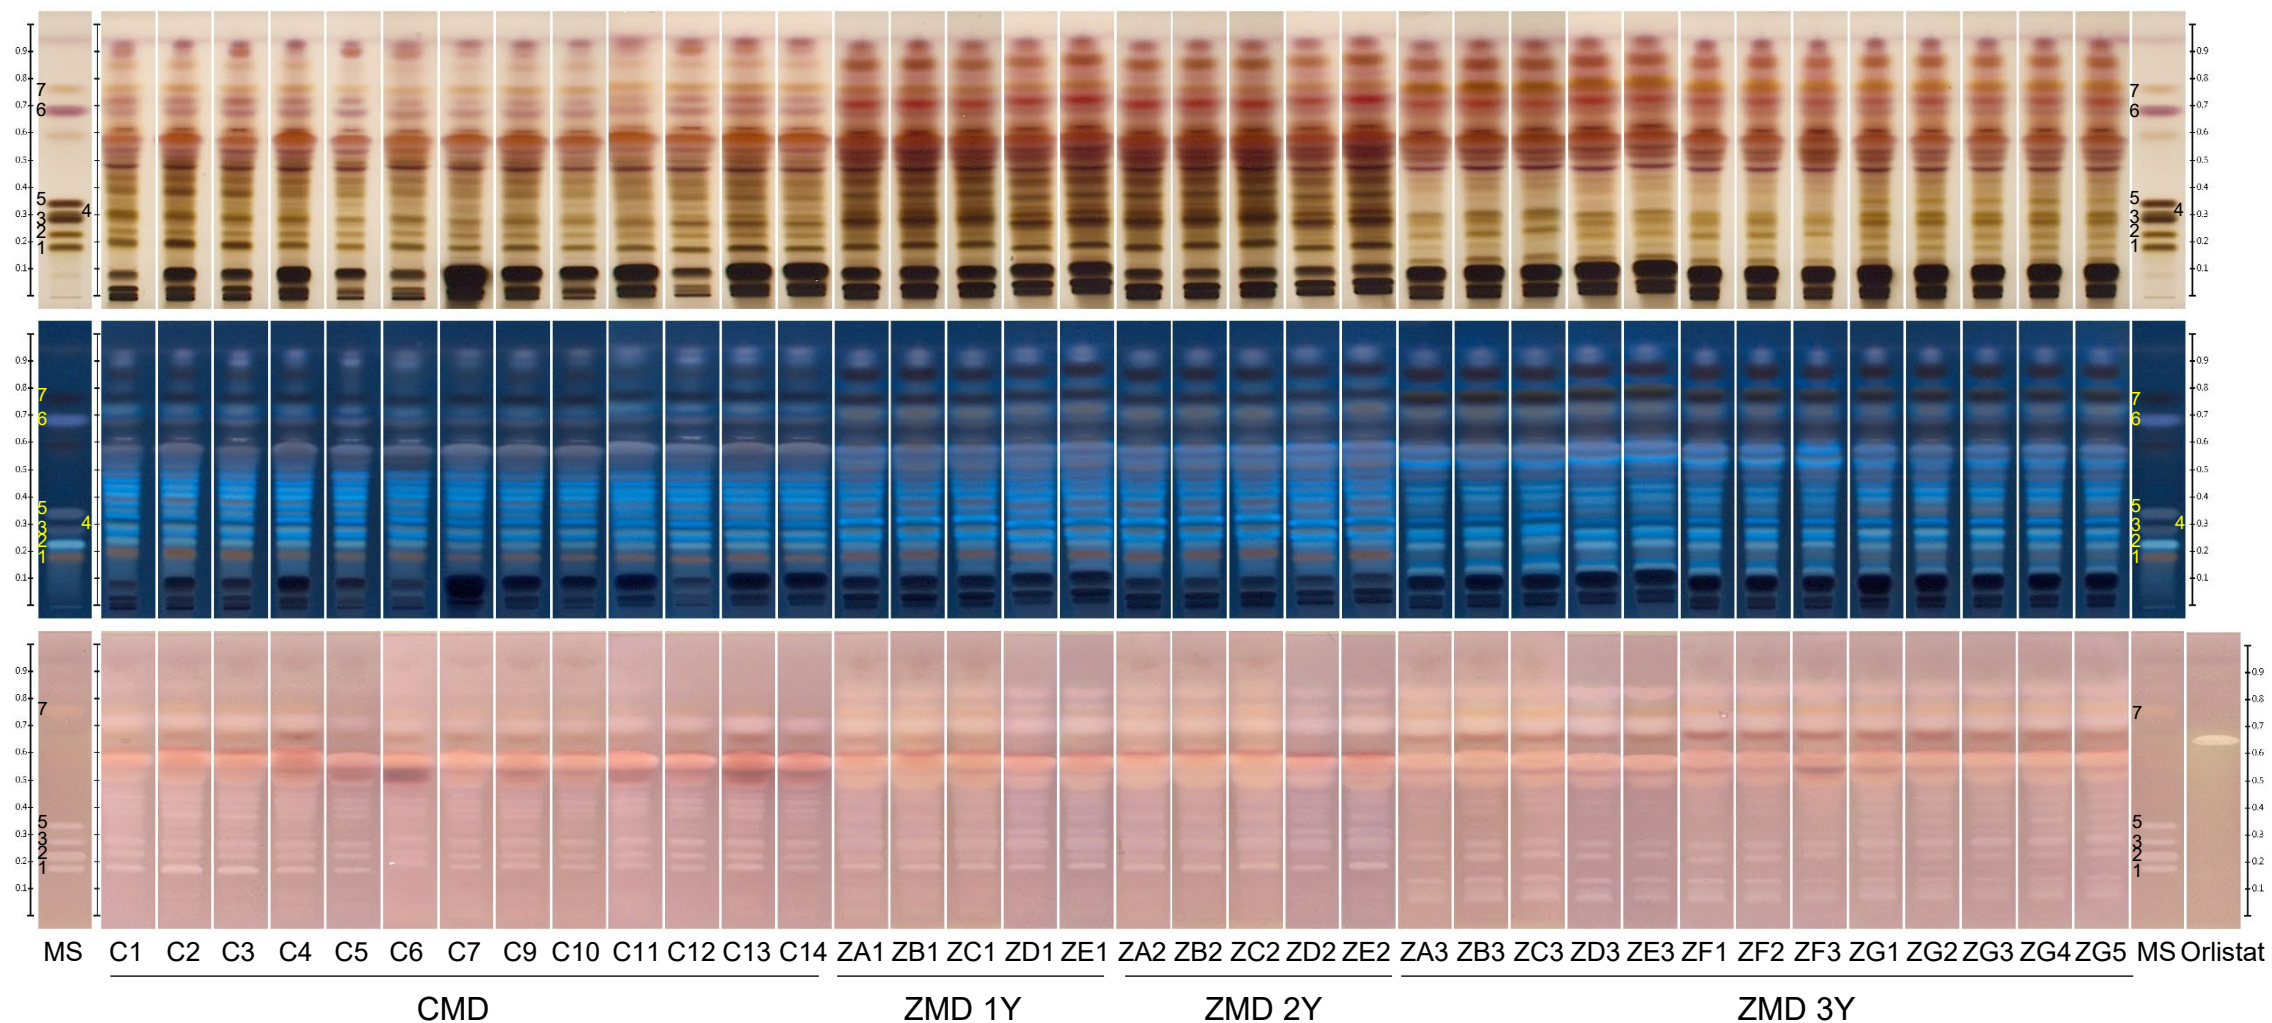

**Figure S1:** HPTLC chromatograms (A and B) and HPTLC bioautograms (C) of mixed standards and *Ophiopogonis Radix* samples. Sample codes are the same as in Table 2. MS: mixed standards. 1. ophiopogonin D, 2. ophiopojaponin C, 3. ophiopogonin D', 4. L-borneol-7-*O*-[ $\beta$ -D-apiofuranosyl(1 $\rightarrow$ 6)]- $\beta$ -D-glucopyranoside, 5. ophiopogonin C', 6.  $\beta$ -sitosterol, and 7. methylphiopogonanone, Orlistat: positive control.
